# Supplementary material for: Influence of polymer binder on the performance of diF-TES-ADT based organic field effect transistor
Source: Royal Society of Chemistry journal article supplement (doi:10.1039/d0ce01467b), 2020-12-10
Supplement: d0ce01467b1.pdf [file d0ce01467b1.pdf]

## Influence of polymer binder on the performance of diF-TES-ADT based organic field effect transistor

Tommaso Salzillo,<sup>a,c,\*</sup> Francesco D'Amico,<sup>b</sup> Nieves Montes,<sup>a</sup> Raphael Pfattner<sup>a</sup> and Marta Mas-Torrent<sup>a,\*</sup>

- 
- a) *Department of Molecular Nanoscience and Organic Materials, Institut de Ciència de Materials de Barcelona (ICMAB-CSIC), Campus de la UAB, 08193 Bellaterra, Spain.  
tommaso.salzillo@unibo.it (T.S.); mmas@icmab.es (M.M.)*
- b) *Elettra Sincrotrone Trieste S.C.p.A., S.S. 14 km 163,5 in Area Science Park, 34149 Basovizza TS, Italy.*
- c) *Department of Materials and Interfaces, Weizmann Institute of Science, 76100 Rehovot, Israel*

## Supporting Information

## 1. Output characteristics for all the diF-TES-ADT polymer OFETs.

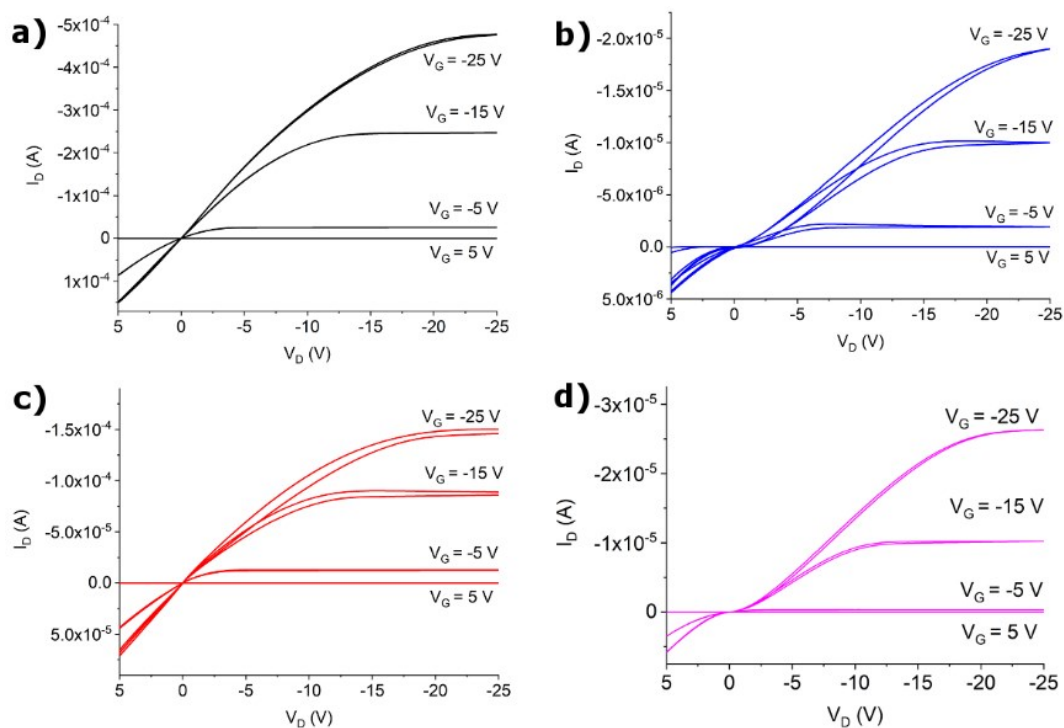

Figure S 1 Output characteristics for diF-TES-ADT blended with PS10K (a), PMMA25K (b), PS100K (c) and PMMA120K (d).

## 2. Resonant Raman spectra of PS and PMMA

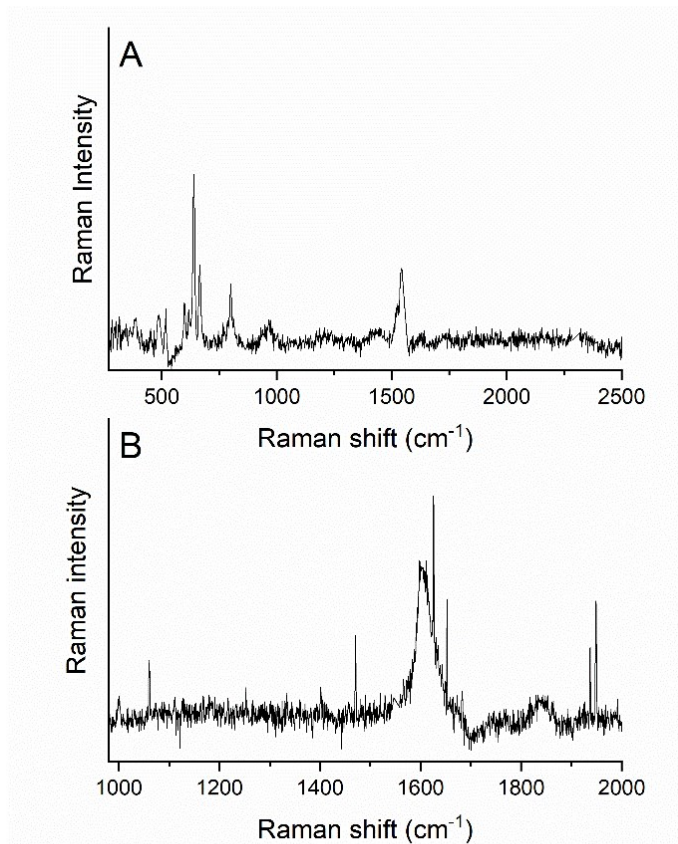

Figure S 2 Resonant Raman spectra of the pure polymer binders PMMA (a) and PS (b), recorded with 266 nm laser excitation.

### 3. X-Ray focused on the (001) peak.

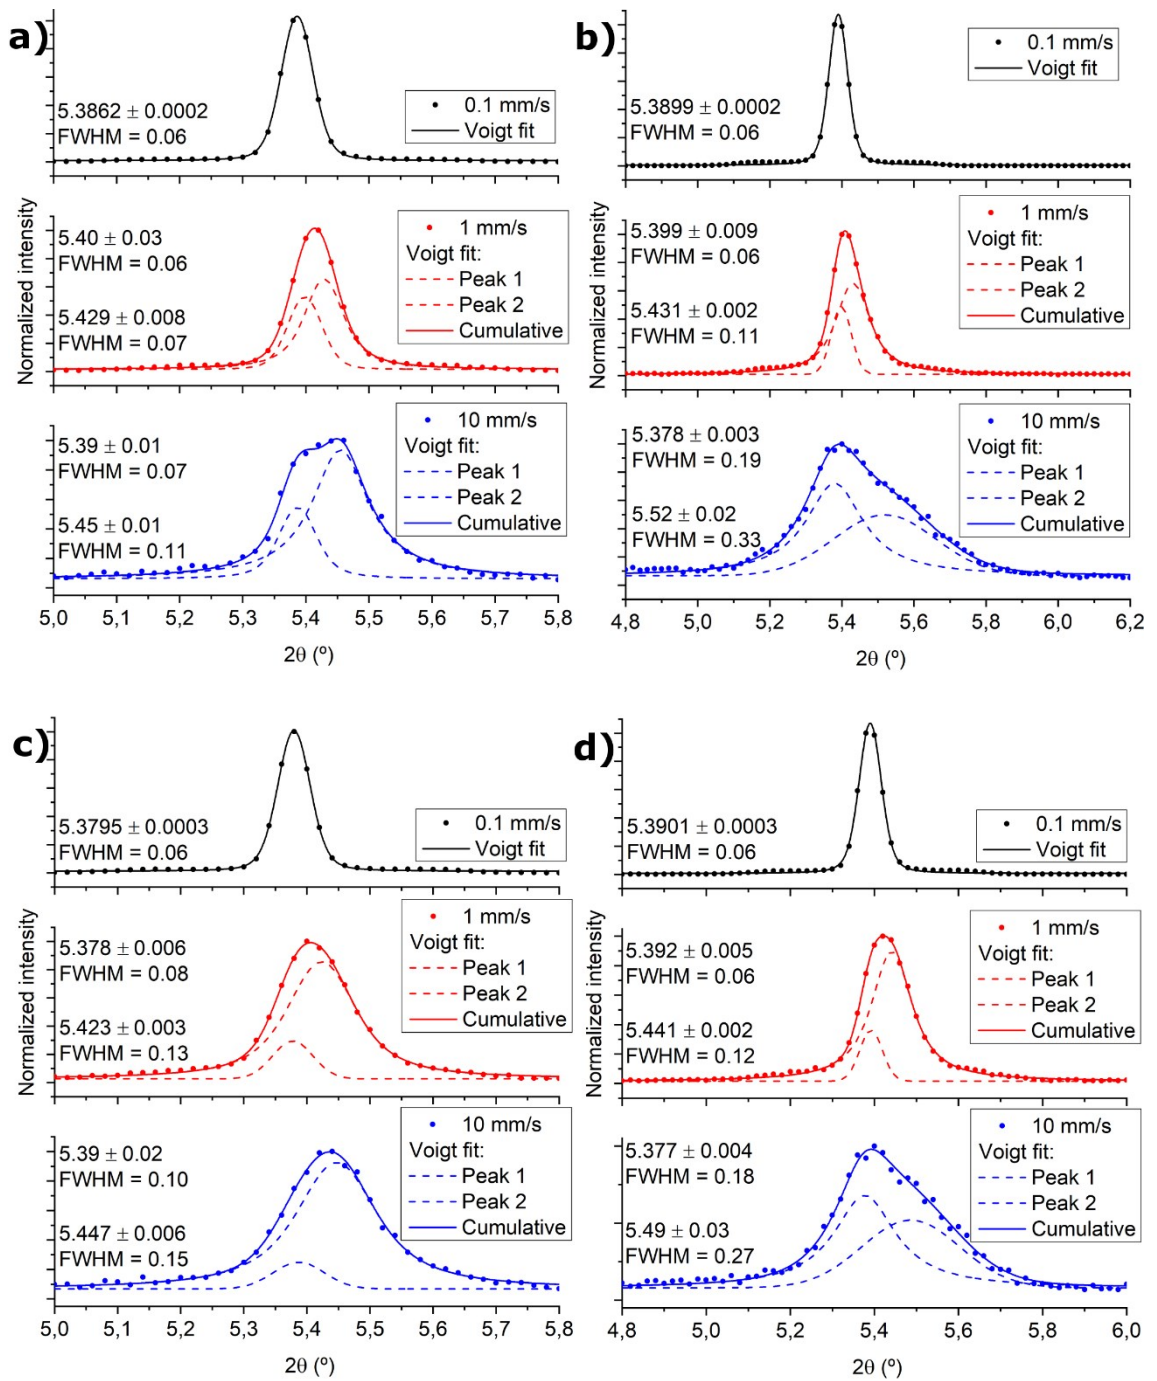

Figure S 3 (001) peak fits of the films fabricated a) PS10K, b) PS100K, c) PMMA25K and d) PMMA120K at different shearing speeds.

#### 4. X-Ray full scale.

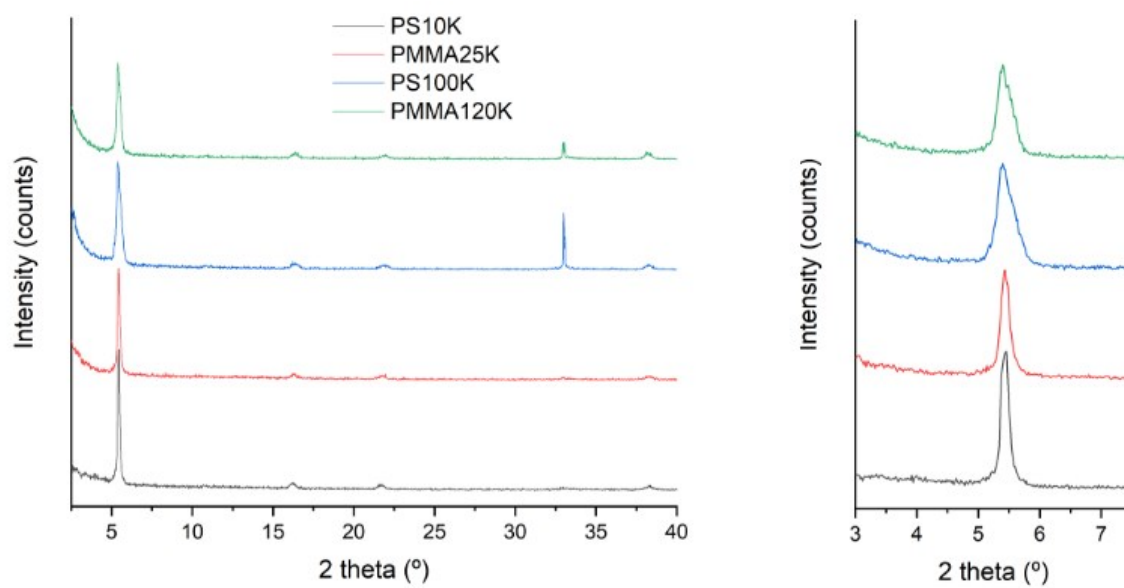

Figure S 45 Full range X-ray diffraction patterns (left) for all the formulations used for the OFET fabrication and a zoom on the (001) diffraction peak (right).
